# Supplementary material for: A fluorescence nanosensor based on modified sustainable silica for highly sensitive detection of the SARS-CoV-2 IgG antibody
Source: Royal Society of Chemistry journal article supplement (doi:10.1039/d4nr04546g), 2025-01-01
Supplement: d4nr04546g1.pdf [file d4nr04546g1.pdf]

## Electronic Supplementary Information (ESI)

# Fluorescence nanosensor based on modified sustainable silica for highly sensitive detection of SARS-CoV-2 IgG antibody

Firda Apriyani,<sup>a,b</sup> Shaimah Rinda Sari,<sup>c</sup> Himawan Tri Bayu Murti Petrus,<sup>d</sup> Marissa Angelina,<sup>e,f</sup> Robeth V. Manurung,<sup>f,g</sup> Ni Luh Wulan Septiani,<sup>f,h</sup> Brian Yulianto<sup>a,b,f</sup> and S. N. Aisyiyah Jenie <sup>\*c,f</sup>

<sup>a</sup> Master Program of Nanotechnology, Graduate School, Institut Teknologi Bandung, Ganesha 10, Bandung, West Java 40132, Indonesia

<sup>b</sup> Advanced Functional Material Research Group, Faculty of Industrial Technology, Institut Teknologi Bandung, Jl. Ganesha No. 10, Bandung, West Java 41032, Indonesia

<sup>c</sup> Research Center for Chemistry, National Research and Innovation Agency (BRIN), Kawasan Puspiptek, Building 452, Serpong, South Tangerang, Banten 15314, Indonesia

<sup>d</sup> Department of Chemical Engineering, Faculty of Engineering, Universitas Gadjah Mada, Jalan Grafika No 2, Yogyakarta, 55281, Indonesia.

<sup>e</sup> Research Center for Pharmaceutical Ingredients and Traditional Medicine, National Research and Innovation Agency (BRIN), Cibinong Science Center (CSC), Bogor, West Java 16911, Indonesia

<sup>f</sup> BRIN and ITB Collaboration Research Center for Biosensor and Biodevices, Jl. Ganesa 10, Bandung, West Java 40132, Indonesia

<sup>g</sup> Research Centre for Electronics, National Research and Innovation Agency (BRIN), Komplek LIPI Building. 20, Jl. Cisitua Lama, Dago, Bandung, West Java 40135, Indonesia

<sup>h</sup> Research Centre for Nanotechnology Systems, National Research and Innovation Agency (BRIN), Kawasan Puspiptek, South Tangerang 15314, Indonesia

\*Corresponding author, Email: siti043@brin.go.id

**Table S1** Percentage of elements in the FSNP sample.

| Element | wt%  |
|---------|------|
| Si      | 69.8 |
| O       | 15   |
| C       | 13.3 |
| Cl      | 1.1  |
| Na      | 0.8  |

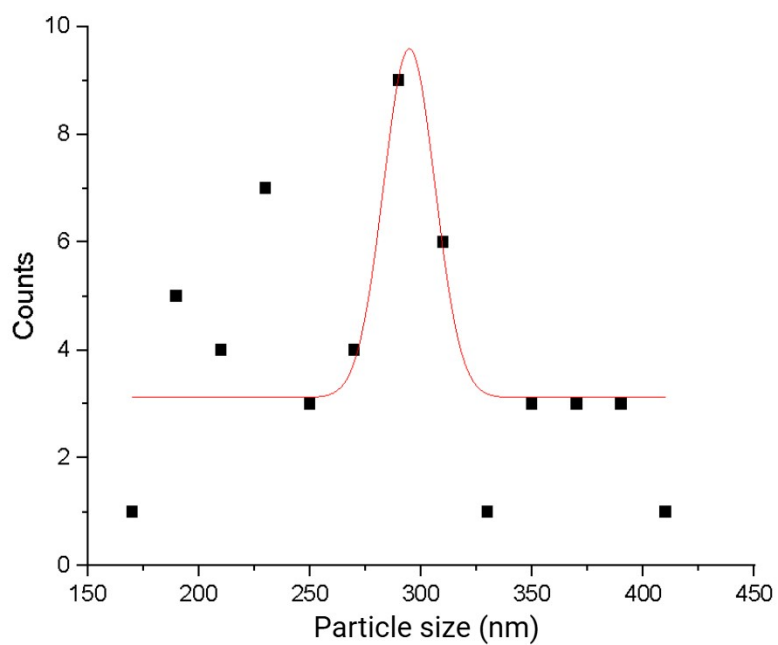

**Fig. S1** Particle size distribution.

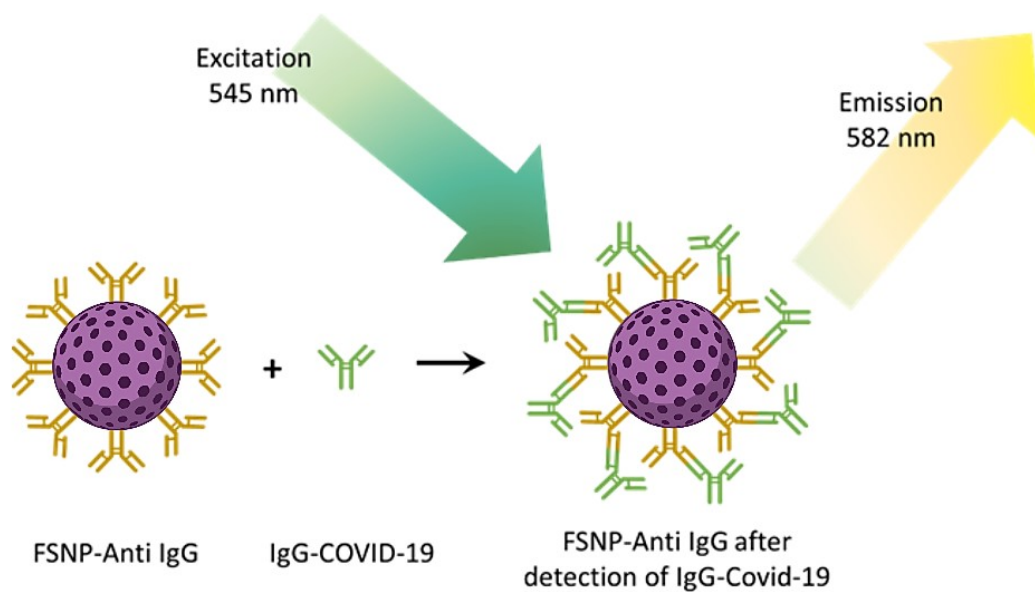

**Fig. S2** The detection process of IgG through FSNP-anti IgG.

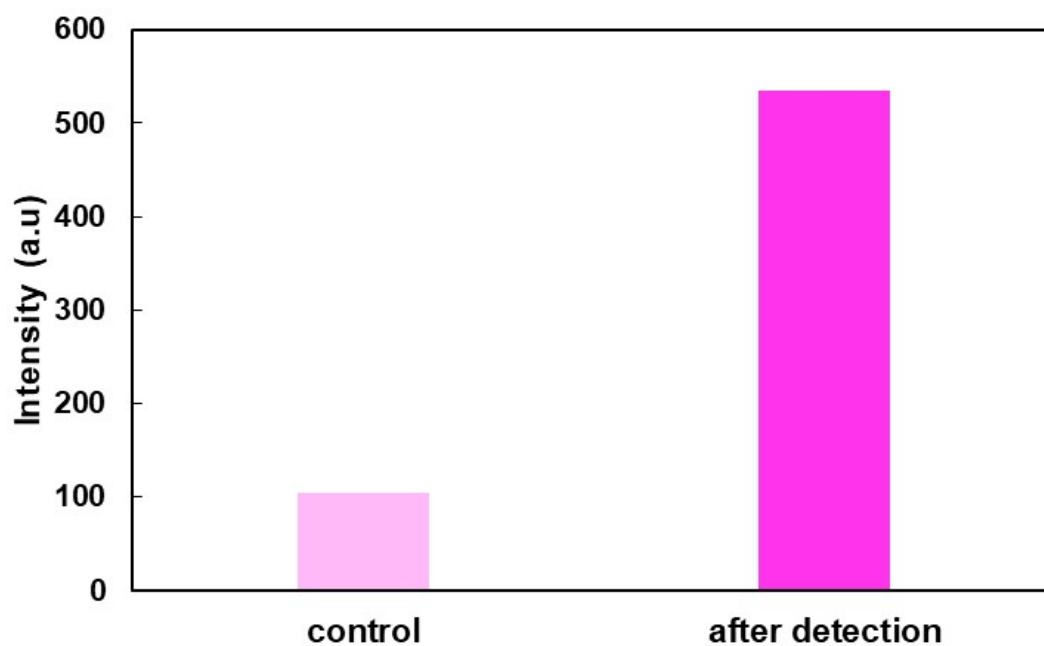

**Fig. S3** The fluorescence intensity of FSNP-anti IgG in PBS solution (before detection) and FSNP-anti IgG in the presence of SARS-CoV-2 IgG antibody (after detection). The concentration of both samples was 0.5  $\mu\text{g}/\text{mL}$  with 15 minutes of incubation time measured with 545 nm excitation and 582 nm emission.
